# Supplementary material
Source: MDPI journal article supplement (https://www.mdpi.com/2305-6320/10/8/49)
Supplement: s1 [file s1]

**Table S1.** FreeText and MeSH search terms in the US National Library of Medicine.

| Category                     | Search Terms                                                                                                                                                                                                                                                                                                     | Results |
|------------------------------|------------------------------------------------------------------------------------------------------------------------------------------------------------------------------------------------------------------------------------------------------------------------------------------------------------------|---------|
| Epilepsy Somatosensory Auras | ("somatosensorial"[All Fields]<br>OR "somatosensory"[All Fields])<br>AND ("epilepsy"[MeSH Terms]<br>OR "epilepsy"[All Fields] OR<br>"aura"[All Fields]) AND<br>("epilepsie"[All Fields] OR<br>"epilepsy"[MeSH Terms] OR<br>"epilepsy"[All Fields] OR<br>"epilepsies"[All Fields] OR<br>"epilepsy s"[All Fields]) | 1671    |
